# Supplementary material
Source: HighWire-hosted journal article supplement (https://bmjopen.bmj.com/content/12/8/e062065)
Supplement: inline-supplementary-material-2 [file inline-supplementary-material-2.xlsx]

## Sheet: Blad1
	Input variables*
		Surgical site infection		Venous thromboembolism		Postoperative bleeding		Luxation		Delirium		Nerve damage
Age (years)	65	0.031	2.015	-0.008	-0.52	0.033	2.145	0.013	0.845	0.127	8.255	-0.051	-3.315
Gender (male/female)	1		0	-0.168	-0.168		0		0		0	-0.254	-0.254
BMI (kg/m2)	30	-0.002	-0.06		0	0.012	0.36	0.021	0.63		0		0
Obesity (yes/no)	0		0	1.376	0		0		0		0		0
Smoking status (yes/no)	0	0.757	0		0	-0.023	0	0.491	0		0	0.572	0
Lung disease (yes/no)	0		0		0		0		0		0		0
Immunological disorder (yes/no)	0	0.891	0		0		0		0		0		0
Rheumatoid arthritis (yes/no)	0		0		0		0	0.538	0		0		0
Diabetes mellitus (yes/no)	0	0.904	0	0.829	0		0		0		0		0
Liver disease (yes/no)	0	2.345	0		0		0		0		0		0
Heart disease (yes/no)	0		0		0	0.729	0		0	0.348	0		0
Disease of central nervous system (yes/no)	0		0		0		0	0.106	0	0.898	0		0
Thromboembolic event (yes/no)	0		0	1.501	0		0		0		0		0
Dysplasia (yes/no)	0		0		0		0		0		0	-0.009	0
Vitamin K antagonist use (yes/no)	0		0		0	0.787	0		0		0		0
NSAID use (yes/no)	0	0.619	0		0		0		0		0		0
		-7.272	1.955	-4.79	-0.688	-7.172	2.505	-5.864	1.475	-14.307	8.255	-2.25	-3.569
			-5.317		-5.478		-4.667		-4.389		-6.052		-5.819
Predicted probability for residual symptoms (%)		0.488349		0.41603		0.931288		1.22609		0.234763		0.296178
		surgical site infection		venous thromboembolism		postoperative bleeding		luxation		delirium		nerve damage
* Age: in years, Gender: male scored as 1 and female scored as 2, BMI: in kg/m2, Obesity: no scored as 0 and yes as 1, Smoking status: no scored as 0 and yes as 1, Lung disease: no scored as 0 and yes as 1, Immunological disorder: no scored as 0 and yes as 1, Rheumatoid arthritis: no scored as 0 and yes as 1, Diabetes mellitus: no scored as 0 and yes as 1, Liver disease: no scored as 0 and yes as…
